# Supplementary material for: Biodiversity Studies for Sustainable Lagoon: Thermophilic and Tropical Fish Species vs. Endemic Commercial Species at Mellah Lagoon (Mediterranean, Algeria)
Source: MDPI journal article supplement (doi:10.3390/w14040635), 2022-02-18
Supplement: s1 [file s1]

Archive with 1 entries (1 files):
- water-1583493-supplementary.pdf
