# Supplementary material for: Biodiversity Studies for Sustainable Lagoon: Thermophilic and Tropical Fish Species vs. Endemic Commercial Species at Mellah Lagoon (Mediterranean, Algeria)
Source: MDPI journal article supplement (doi:10.3390/w14040635), 2022-02-18
Supplement: s1 [file s1 › water-1583493-supplementary.pdf]

# Biodiversity Studies for Sustainable Lagoon: Thermophilic and Tropical Fish Species vs. Endemic Commercial Species at Mellah Lagoon (Mediterranean, Algeria)

Costantino Parisi <sup>1,†</sup>, Giuseppe De Marco <sup>2,†</sup>, Sofiane Labar <sup>3</sup>, Mustapha Hasnaoui <sup>4</sup>, Gaetano Grieco <sup>1,3</sup>, Lidia Caserta <sup>1</sup>, Sara Inglese <sup>1</sup>, Rubina Vangone <sup>1,\*</sup>, Adriano Madonna <sup>1</sup>, Magdy Alwany <sup>5</sup>, Olfa Hentati <sup>6</sup> and Giulia Guerriero <sup>1,7,\*</sup>

<sup>1</sup> Comparative Endocrinology Laboratories (EClab), Department of Biology, University of Naples Federico II, Via Cinthia 26, 80126 Naples, Italy; parisi.eclab@gmail.com (C.P.); grieco.eclab@gmail.com (G.G.); casertaecclab@gmail.com (L.C.); inglese.eclab@gmail.com (S.I.); adrimad49@gmail.com (A.M.);

<sup>2</sup> Department of Chemical, Biological, Pharmaceutical and Environmental Sciences, University of Messina, 98166 Messina, Italy; gdemarco@unime.it

<sup>3</sup> Department of Geography and Territorial Planning, Houari Boumediene University of Science and Technology, Algiers 16000, Algeria; labar\_sf@yahoo.fr

<sup>4</sup> Environmental Engineering Team, Department of life Sciences, Faculty of Sciences and Techniques, University of Sultan Moulay Slimane, BO. 523, Beni Mellal 23000, Morocco; m.hasnaoui@usms.ma

<sup>5</sup> Marine Biology Department, Faculty of Science, Suez Canal University, Ismailia 41522, Egypt; magdy.elalwany@yahoo.com

<sup>6</sup> Institut Supérieur de Biotechnologie de Sfax, Département de Biotechnologie et Santé & Laboratoire Génie de l'Environnement et Ecotechnologie (GEET), Ecole Nationale d'Ingénieurs de Sfax (ENIS), University of Sfax, Sfax 3038, Tunisia; olfa.hentati@isbs.usf.tn

<sup>7</sup> Interdepartmental Research Centre for Environment, University of Naples Federico II, 80134 Naples, Italy

\* Correspondence: vangoneeclab@gmail.com (R.V.); giulia.guerriero@unina.it (G.G.)

† These authors contributed equally to this work.

**Table S1:** Number and Total Length range (cm) of fish species caught in April 2018 and April 2021.

| Scientific name                | N. samples         | N. samples         | Tot. length range<br>(cm) |
|--------------------------------|--------------------|--------------------|---------------------------|
|                                | 2018<br>(tot. 705) | 2021<br>(tot. 656) |                           |
| <i>Anguilla anguilla</i>       | 11                 | 14                 | 45-110                    |
| <i>Apogon imberbis</i>         | 3                  | 7                  | 9-13                      |
| <i>Atherina boyeri</i>         | 7                  | 9                  | 13-15                     |
| <i>Belone belone</i>           | 8                  | 5                  | 27-53                     |
| <i>Lichia amia</i>             | 7                  | 3                  | 25-30                     |
| <i>Parablennius pilicornis</i> | 28                 | 19                 | 15-19                     |
| <i>Conger conger</i>           | 15                 | 12                 | 34-80                     |
| <i>Aphanius fasciatus</i>      | 100                | 50                 | 1-3                       |
| <i>Gobius cobitis</i>          | 32                 | 21                 | 10-15                     |
| <i>Gobius bucchichi</i>        | 21                 | 22                 | 5-10                      |
| <i>Gobius niger</i>            | 28                 | 32                 | 6-18                      |
| <i>Gobius paganellus</i>       | 25                 | 13                 | 9-11                      |
| <i>Coris julis</i>             | 6                  | 6                  | 7-18                      |
| <i>Simphodus tinca</i>         | 8                  | 5                  | 8-22                      |
| <i>Thalassoma pavo</i>         | 9                  | 8                  | 4-11                      |
| <i>Dicentrarchus labrax</i>    | 15                 | 16                 | 11- 30                    |
| <i>Chelon labrosus</i>         | 21                 | 18                 | 15-21                     |
| <i>Chelon aurata</i>           | 22                 | 24                 | 25-30                     |
| <i>Chelon ramada</i>           | 18                 | 22                 | 15-20                     |
| <i>Liza saliens</i>            | 7                  | 9                  | 19-22                     |
| <i>Mugil cephalus</i>          | 20                 | 18                 | 11-35                     |
| <i>Mullus surmuletus</i>       | 3                  | 11                 | 9-35                      |
| <i>Muraena helena</i>          | 12                 | 16                 | 28-90                     |
| <i>Gambusia holbrooki</i>      | 100                | 100                | 2-6                       |
| <i>Scorpaena scrofa</i>        | 4                  | 6                  | 9-35                      |
| <i>Serranus hepatus</i>        | 7                  | 7                  | 6-13                      |
| <i>Solea senegalensis</i>      | 27                 | 25                 | 7-18                      |
| <i>Boops boops</i>             | 18                 | 20                 | 11-20                     |
| <i>Diplodus puntazzo</i>       | 21                 | 23                 | 16-35                     |
| <i>Diplodus sargus</i>         | 16                 | 25                 | 11-18                     |
| <i>Diplodus vulgaris</i>       | 22                 | 24                 | 9-16                      |
| <i>Lithognathus mormyrus</i>   | 6                  | 21                 | 17-30                     |
| <i>Sarpa salpa</i>             | 16                 | 14                 | 12-18                     |
| <i>Sparus aurata</i>           | 8                  | 10                 | 8-16                      |
| <i>Oblada melanura</i>         | 5                  | 5                  | 12-27                     |
| <i>Hippocampus ramulosus</i>   | 7                  | 4                  | 7-10                      |
| <i>Syngnathus abaster</i>      | 22                 | 12                 | 5-12                      |

**Table S2:** Identification of species with high population density in Mellah Lagoon. The colored arrows indicate the main anatomical distinguishing characteristics pertaining to family, genus and species.

| Schematic fish image                                                               | Family characteristics                                                                                                                                                                                                                             | Genus characteristics                                                                                      | Species characteristics                                                                                       |
|------------------------------------------------------------------------------------|----------------------------------------------------------------------------------------------------------------------------------------------------------------------------------------------------------------------------------------------------|------------------------------------------------------------------------------------------------------------|---------------------------------------------------------------------------------------------------------------|
| 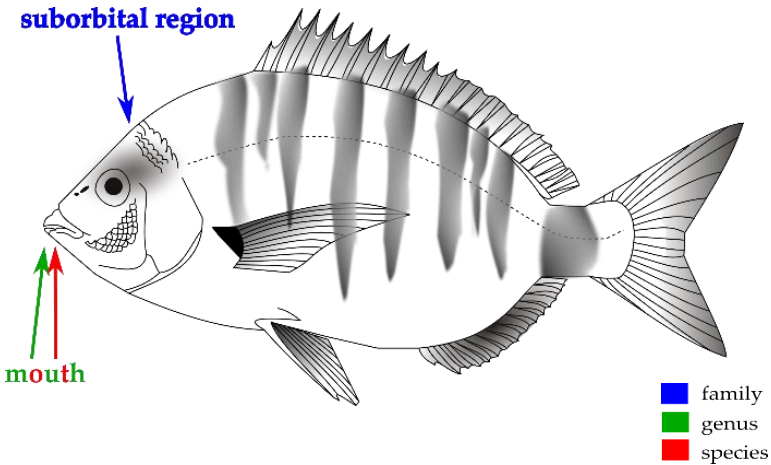   | <b>Sparidae (family):</b> snout and suborbital region scaleless, cheeks scaly; no supramaxilla; upper jaw never extending backward beyond a vertical line through middle of eye; premaxilla overlaps maxilla at distal tip; maxilla without scales | <b>Diplodus (genus):</b> Upper jaw with 8 to 12 medial incisors; no greatly enlarged pair of molars in jaw | <b>puntazzo (species):</b> Molars very rudimentary                                                            |
| 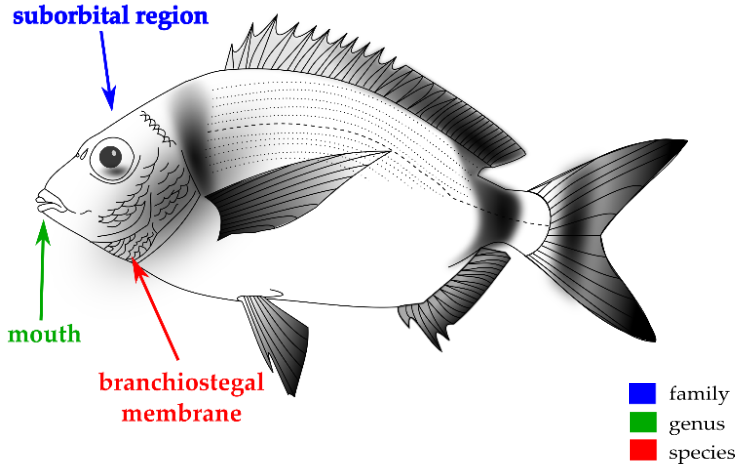 | <b>Sparidae (family):</b> snout and suborbital region scaleless, cheeks scaly; no supramaxilla; upper jaw never extending backward beyond a vertical line through middle of eye; premaxilla overlaps maxilla at distal tip; maxilla without scales | <b>Diplodus (genus):</b> Upper jaw with 8 to 12 medial incisors; no greatly enlarged pair of molars in jaw | <b>vulgaris (species):</b> Nuchal band large, triangular; hind edge of branchiostegal membrane light coloured |

|                                                                                   |                                                                                                                                                                                                                                                           |                                                                                                                   |                                                                                                                        |
|-----------------------------------------------------------------------------------|-----------------------------------------------------------------------------------------------------------------------------------------------------------------------------------------------------------------------------------------------------------|-------------------------------------------------------------------------------------------------------------------|------------------------------------------------------------------------------------------------------------------------|
| 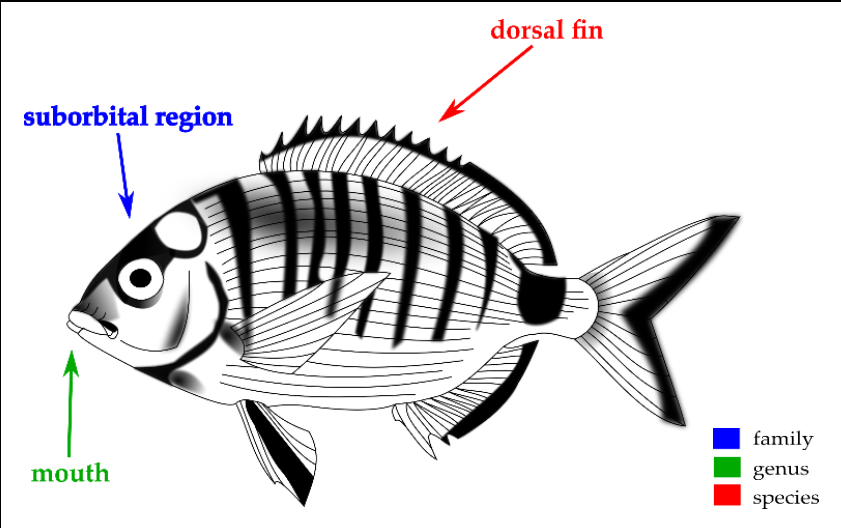   | <p><b>Sparidae (family):</b> snout and suborbital region scaleless, cheeks scaly; no supramaxilla; upper jaw never extending backward beyond a vertical line through middle of eye; premaxilla overlaps maxilla at distal tip; maxilla without scales</p> | <p><b>Diplodus (genus):</b> Upper jaw with 8 to 12 medial incisors; no greatly enlarged pair of molars in jaw</p> | <p><b>sargus (species):</b> Peduncular bar saddle-shaped; lateral-line scales 57 to 71; dorsal-fin spines 11 or 12</p> |
| 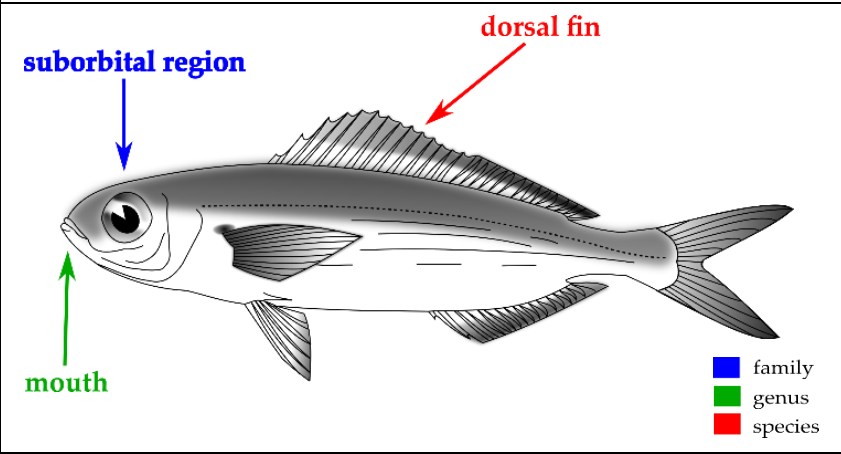 | <p><b>Sparidae (family):</b> snout and suborbital region scaleless, cheeks scaly; no supramaxilla; upper jaw never extending backward beyond a vertical line through middle of eye; premaxilla overlaps maxilla at distal tip; maxilla without scales</p> | <p><b>Boops (genus):</b> A single row of incisors in both jaws</p>                                                | <p><b>boops (species):</b> Dorsal fin with 13 to 15 spines; body fusiform</p>                                          |

|                                                                                                                                                                              |                                                                                                                                                                                                                                                                                   |                                                                                                                                       |                                                                                                                                     |
|------------------------------------------------------------------------------------------------------------------------------------------------------------------------------|-----------------------------------------------------------------------------------------------------------------------------------------------------------------------------------------------------------------------------------------------------------------------------------|---------------------------------------------------------------------------------------------------------------------------------------|-------------------------------------------------------------------------------------------------------------------------------------|
| 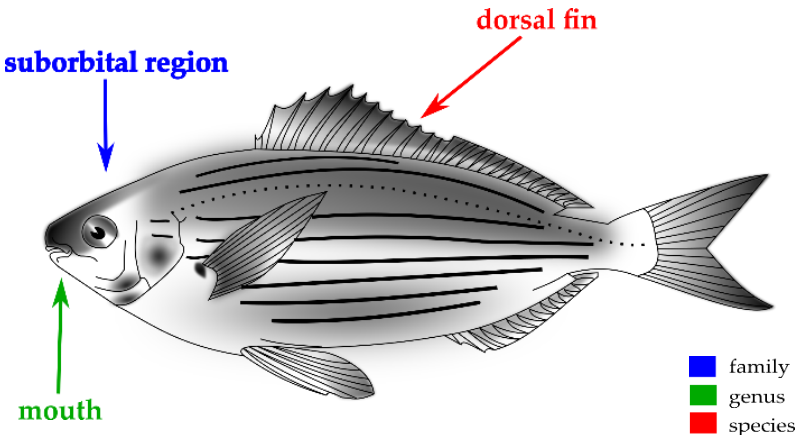 <p>suborbital region</p> <p>mouth</p> <p>dorsal fin</p> <p>family<br/>genus<br/>species</p> | <p><b>Sparidae (family):</b> snout and suborbital region scaleless, cheeks scaly; no supramaxilla; upper jaw never extending backward beyond a vertical line through middle of eye; premaxilla overlaps maxilla at distal tip; maxilla without scales</p>                         | <p><b>Sarpa (genus):</b> A single row of incisors in both jaws</p>                                                                    | <p><b>salpa (species):</b> Dorsal fin with 11 or 12 spines; body oblong</p>                                                         |
| 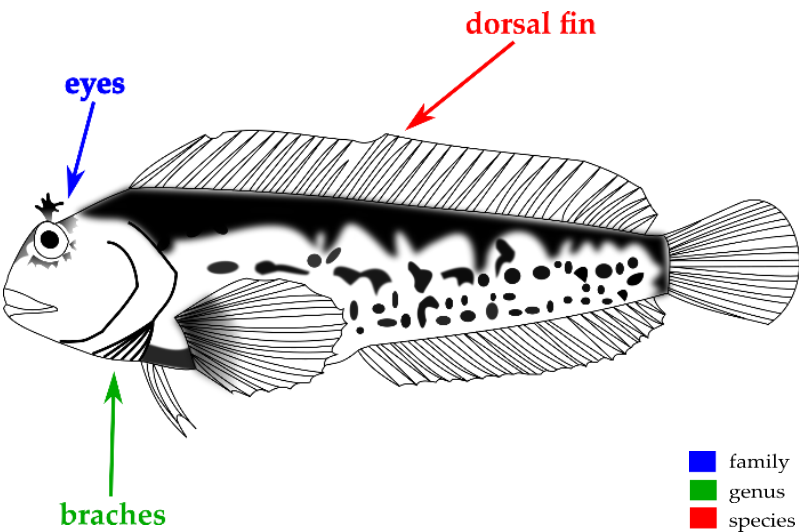 <p>eyes</p> <p>braches</p> <p>dorsal fin</p> <p>family<br/>genus<br/>species</p>           | <p><b>Blenniidae (family):</b> All species lack scales. Head usually with cirri or fleshy flaps on eye, dorsal and anal fins long, their spines usually flexible; dorsal fin occasionally high anteriorly, with fewer spines than segmented (soft) rays; 2 spines in anal fin</p> | <p><b>Parablennius (genus):</b> Lateral line forming continuous tube anteriorly, with regularly spaced, short transverse Branches</p> | <p><b>pilicornis (species):</b> Segmented dorsal-fin rays 20 to 22; segmented anal-fin rays 22 to 24; caudal vertebrae 28 to 30</p> |

|                                                                                                                                                                           |                                                                                                                                                                                                                                                                                                  |                                                                                                                                                                  |                                                                                                                                                                           |
|---------------------------------------------------------------------------------------------------------------------------------------------------------------------------|--------------------------------------------------------------------------------------------------------------------------------------------------------------------------------------------------------------------------------------------------------------------------------------------------|------------------------------------------------------------------------------------------------------------------------------------------------------------------|---------------------------------------------------------------------------------------------------------------------------------------------------------------------------|
| 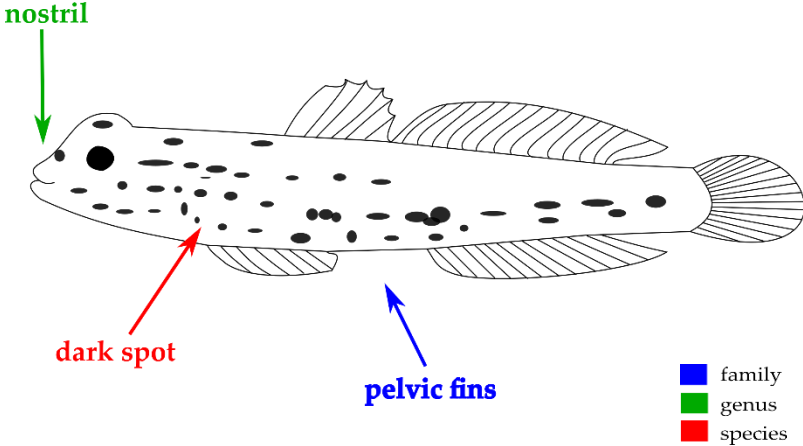 <p>nostril</p> <p>dark spot</p> <p>pelvic fins</p> <p>family<br/>genus<br/>species</p>   | <p><b>Gobiidae (family):</b> Pelvic fins (1 spine and 5 soft rays) typically united into a simple disc, completed by an anterior transverse membrane between the spinous rays, or, if mostly separate, still connected by a low transverse membrane between the bases of the fifth soft rays</p> | <p><b>Gobius (genus):</b> Anterior nostril rim with at least a lappet or thin process; uppermost pectoral rays more or less free; row 6i ends well above row</p> | <p><b>bucchichi (species):</b> Scales in lateral series 50 to 56; body with longitudinal rows of small dark spots; pelvic disc complete</p>                               |
| 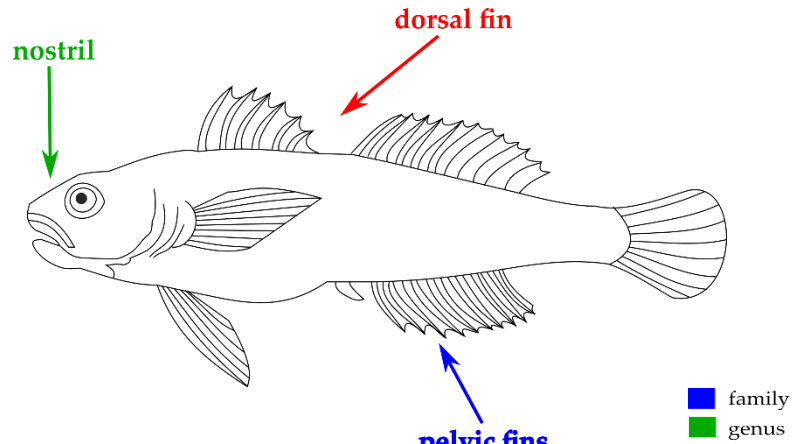 <p>nostril</p> <p>dorsal fin</p> <p>pelvic fins</p> <p>family<br/>genus<br/>species</p> | <p><b>Gobiidae (family):</b> Pelvic fins (1 spine and 5 soft rays) typically united into a simple disc, completed by an anterior transverse membrane between the spinous rays, or, if mostly separate, still connected by a low transverse membrane between the bases of the fifth soft rays</p> | <p><b>Gobius (genus):</b> Anterior nostril rim with at least a lappet or thin process; uppermost pectoral rays more or less free; row 6i ends well above row</p> | <p><b>niger (species):</b> Nape scaled; first dorsal fin with spot in upper anterior corner, and middle rays more or less elongate; scales in lateral series 32 to 42</p> |

|                                                                                                                                                                                                                                                                                                                                                                                                |                                                                                                                                                                                                                                                                                                  |                                                                                                                                                                  |                                                                                                                            |
|------------------------------------------------------------------------------------------------------------------------------------------------------------------------------------------------------------------------------------------------------------------------------------------------------------------------------------------------------------------------------------------------|--------------------------------------------------------------------------------------------------------------------------------------------------------------------------------------------------------------------------------------------------------------------------------------------------|------------------------------------------------------------------------------------------------------------------------------------------------------------------|----------------------------------------------------------------------------------------------------------------------------|
| 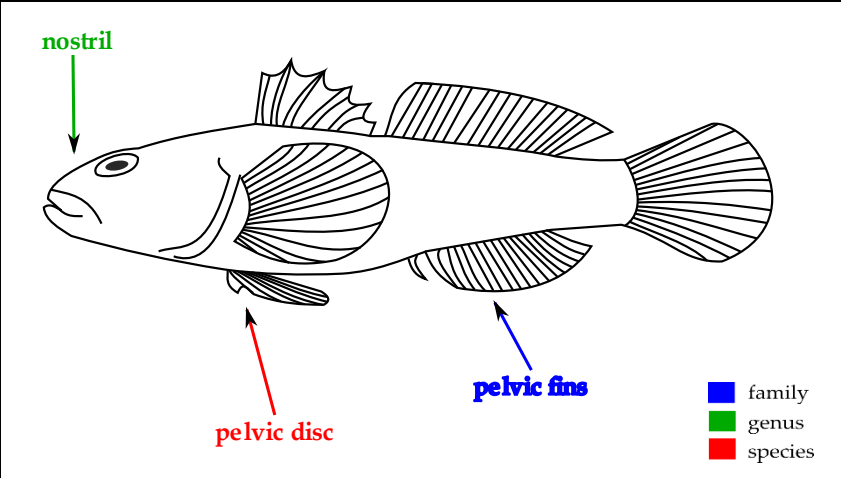 <p>A line drawing of a fish in profile, facing left. A green arrow points to the nostril. A red arrow points to the pelvic disc. A blue arrow points to the pelvic fins. A legend in the bottom right corner shows a blue square for 'family', a green square for 'genus', and a red square for 'species'.</p> | <p><b>Gobiidae (family):</b> Pelvic fins (1 spine and 5 soft rays) typically united into a simple disc, completed by an anterior transverse membrane between the spinous rays, or, if mostly separate, still connected by a low transverse membrane between the bases of the fifth soft rays</p> | <p><b>Gobius (genus):</b> Anterior nostril rim with at least a lappet or thin process; uppermost pectoral rays more or less free; row 6i ends well above row</p> | <p><b>cobitis (species):</b> Scales in lateral series 59 to 67; pelvic disc anterior membrane with large lateral lobes</p> |
| 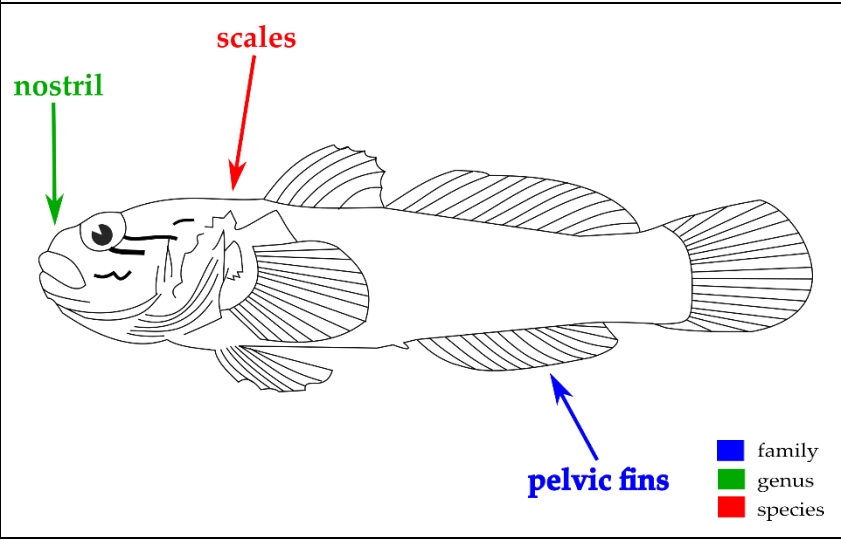 <p>A line drawing of a fish in profile, facing left. A green arrow points to the nostril. A red arrow points to the scales. A blue arrow points to the pelvic fins. A legend in the bottom right corner shows a blue square for 'family', a green square for 'genus', and a red square for 'species'.</p>    | <p><b>Gobiidae (family):</b> Pelvic fins (1 spine and 5 soft rays) typically united into a simple disc, completed by an anterior transverse membrane between the spinous rays, or, if mostly separate, still connected by a low transverse membrane between the bases of the fifth soft rays</p> | <p><b>Gobius (genus):</b> Anterior nostril rim with at least a lappet or thin process; uppermost pectoral rays more or less free; row 6i ends well above row</p> | <p><b>paganellus (species):</b> Scales in lateral series 50 to 55 (46 to 59)</p>                                           |

|                                                                                                                                                                |                                                                                                                                                                                                                                                                    |                                                                                                                                                         |                                                                                                                                                                                        |
|----------------------------------------------------------------------------------------------------------------------------------------------------------------|--------------------------------------------------------------------------------------------------------------------------------------------------------------------------------------------------------------------------------------------------------------------|---------------------------------------------------------------------------------------------------------------------------------------------------------|----------------------------------------------------------------------------------------------------------------------------------------------------------------------------------------|
| 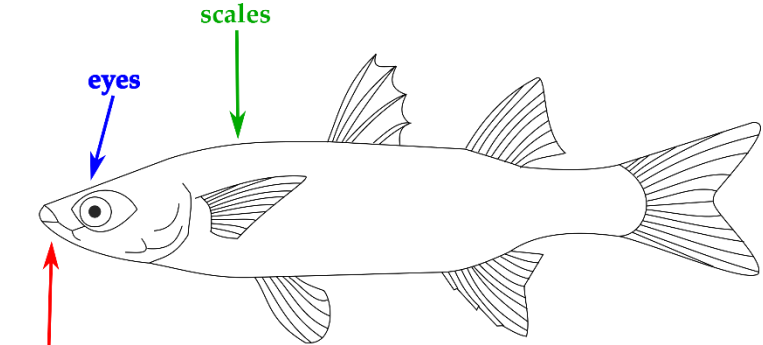 <p>mouth</p> <p>eyes</p> <p>scales</p> <p>family<br/>genus<br/>species</p>    | <p><b>Mugillidae (family):</b> Eyes often partly covered by adipose “eyefold” tissue. Mouth small or moderate in size, terminal or inferior, large, modified scales may be present above pectoral and pelvic fins (axillary scales) and below first dorsal fin</p> | <p><b>Chelon (genus):</b> Scales either ctenoid or cycloid but without denticulations on hind margin; pectoral axillary scale rudimentary or absent</p> | <p><b>labrosus (species):</b> Thick upper lip, its height substantially equal to the pupillary diameter, and provided with several rows of taste buds, corneas in adults</p>           |
| 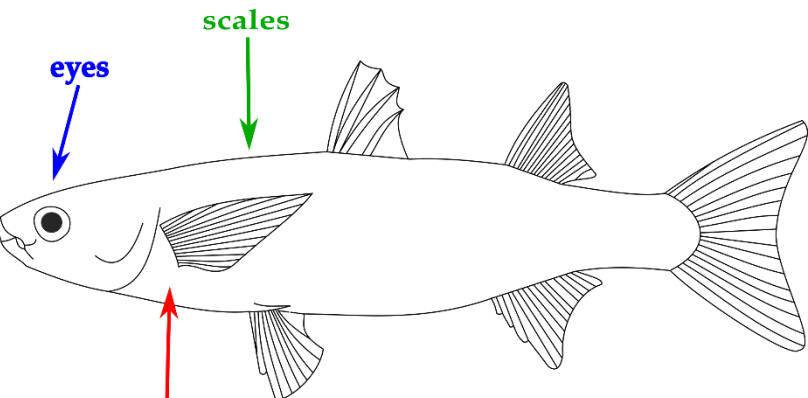 <p>no stain</p> <p>eyes</p> <p>scales</p> <p>family<br/>genus<br/>species</p> | <p><b>Mugillidae (family):</b> Eyes often partly covered by adipose “eyefold” tissue. Mouth small or moderate in size, terminal or inferior, large, modified scales may be present above pectoral and pelvic fins (axillary scales) and below first dorsal fin</p> | <p><b>Chelon (genus):</b> Scales either ctenoid or cycloid but without denticulations on hind margin; pectoral axillary scale rudimentary or absent</p> | <p><b>aurata (species):</b> Scaling of the head finishing at the level of posterior nostrils; posterior edge of the preorbital sharp; no stain black in the armpit of the pectoral</p> |

|                                                                                                                                                               |                                                                                                                                                                                                                                                                    |                                                                                                                                                                                                                                                                                                                          |                                                                                                                                                                                                                                                                                                                                                                                                                         |
|---------------------------------------------------------------------------------------------------------------------------------------------------------------|--------------------------------------------------------------------------------------------------------------------------------------------------------------------------------------------------------------------------------------------------------------------|--------------------------------------------------------------------------------------------------------------------------------------------------------------------------------------------------------------------------------------------------------------------------------------------------------------------------|-------------------------------------------------------------------------------------------------------------------------------------------------------------------------------------------------------------------------------------------------------------------------------------------------------------------------------------------------------------------------------------------------------------------------|
| 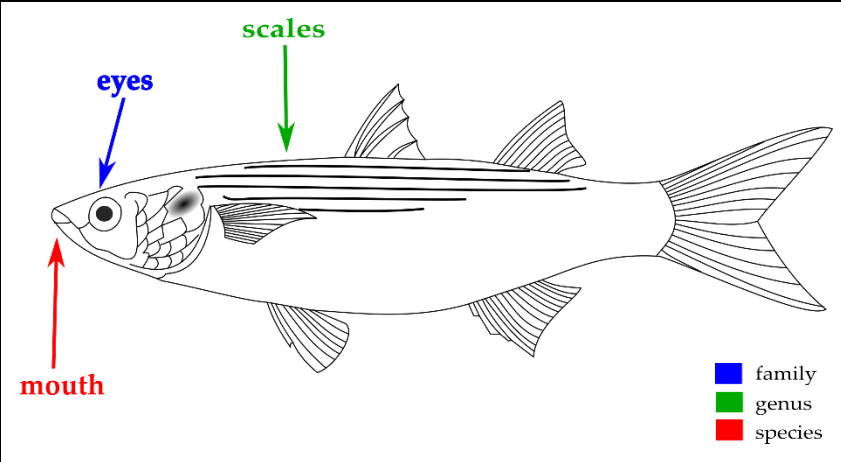 <p>eyes</p> <p>scales</p> <p>mouth</p> <p>family<br/>genus<br/>species</p>    | <p><b>Mugillidae (family):</b> Eyes often partly covered by adipose “eyefold” tissue. Mouth small or moderate in size, terminal or inferior, large, modified scales may be present above pectoral and pelvic fins (axillary scales) and below first dorsal fin</p> | <p><b>Chelon (genus):</b> Scales either ctenoid or cycloid but without denticulations on hind margin; pectoral axillary scale rudimentary or absent</p>                                                                                                                                                                  | <p><b>ramada (species):</b> lower lip with a high symphysial knob, folding up at hind end to obscure the upper lip</p>                                                                                                                                                                                                                                                                                                  |
| 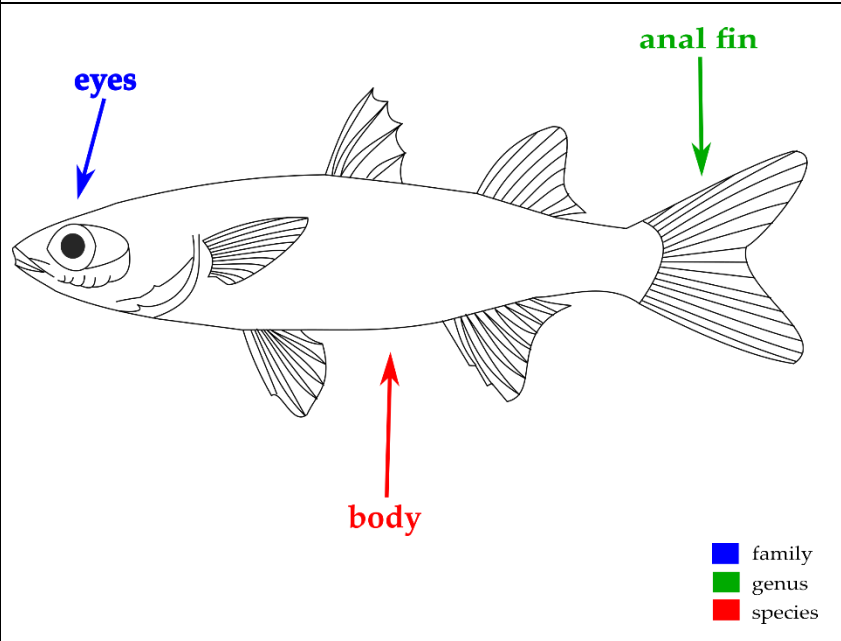 <p>eyes</p> <p>anal fin</p> <p>body</p> <p>family<br/>genus<br/>species</p> | <p><b>Mugillidae (family):</b> Eyes often partly covered by adipose “eyefold” tissue. Mouth small or moderate in size, terminal or inferior, large, modified scales may be present above pectoral and pelvic fins (axillary scales) and below first dorsal fin</p> | <p><b>Mugil (genus):</b> Maxilla straight, posterior tip not curved down; preorbital slender with straight anteroventral edge and a pointed posteroventral end adipose eyefold always extensive in adults; dentary symphysis pointed, usually less than 90° in adults, anal fin with III spines and 8 or 9 soft rays</p> | <p><b>cephalus (species):</b> Thirty-six or more scales in longitudinal series; body depth at origin of first dorsal fin usually 24 to 28% standard length; body depth at origin of anal fin usually 20 to 24% standard length; head depth equal to or greater than head width at level of posterior of operculum; origin of fully erected second dorsal fin just posterior to vertical level of origin of anal fin</p> |

|                                                                                                                                                                            |                                                                                                                                                                                                                                                                                                                                                                          |                                                                                                                                                                                                            |                                                                                                                                  |
|----------------------------------------------------------------------------------------------------------------------------------------------------------------------------|--------------------------------------------------------------------------------------------------------------------------------------------------------------------------------------------------------------------------------------------------------------------------------------------------------------------------------------------------------------------------|------------------------------------------------------------------------------------------------------------------------------------------------------------------------------------------------------------|----------------------------------------------------------------------------------------------------------------------------------|
| 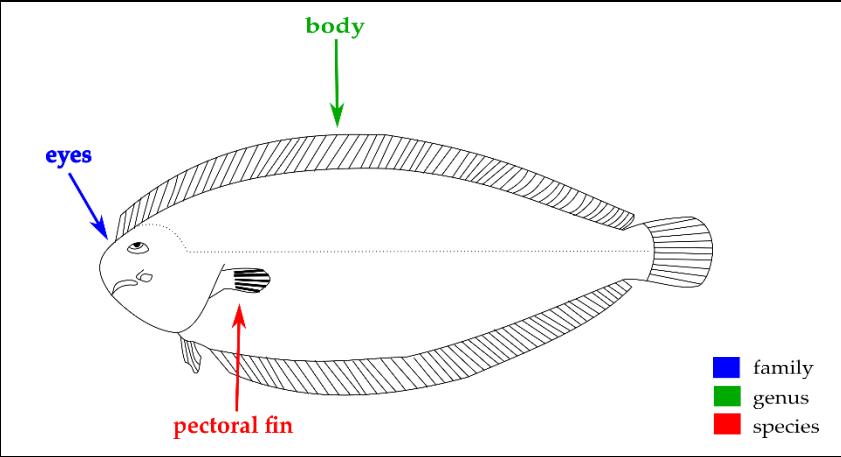 <p>eyes</p> <p>body</p> <p>pectoral fin</p> <p>family<br/>genus<br/>species</p>            | <p><b>Soleidae (family):</b> Eyes on right side of body. Preopercle without free margin, embedded in skin</p>                                                                                                                                                                                                                                                            | <p><b>Solea (genus):</b> Anterior nasal tube on eyed side short, not reaching beyond midpoint of lower eye; body and head without transverse wavy lines, but with more or less distinct black blotches</p> | <p><b>senegalensis (species):</b> pectoral fin with black membrane and white rays</p>                                            |
| 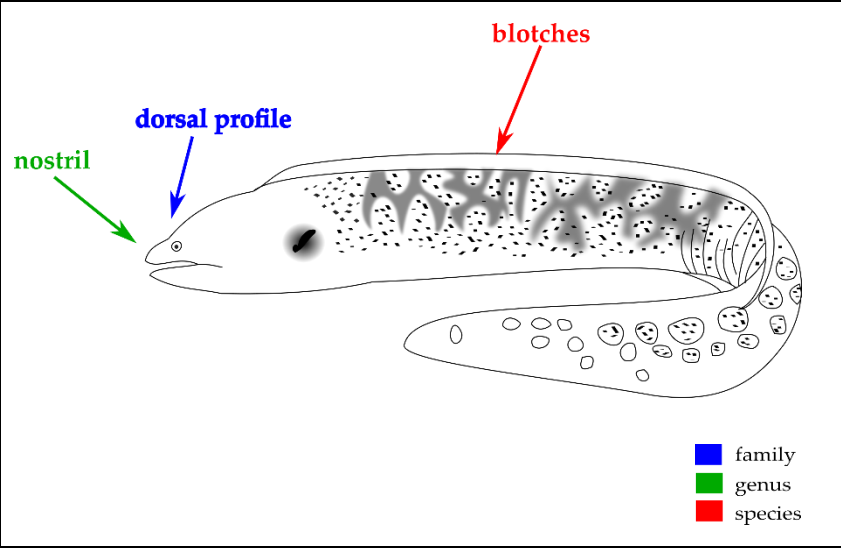 <p>nostril</p> <p>dorsal profile</p> <p>blotches</p> <p>family<br/>genus<br/>species</p> | <p><b>Muraenidae (family):</b> Typically, the dorsal profile above and behind the eye is steep; posterior nostrils above anterior portion of eye, usually as a simple hole with a raised rim, but sometimes tubular. No lateral line pores on body, but a reduced complement of lateral line pores on head, including typically 1 or 2 above and before gill opening</p> | <p><b>Muraena (genus):</b> Posterior nostril with a tube</p>                                                                                                                                               | <p><b>helena (species):</b> colour yellowish brown, with large pale blotches including a rosette pattern of small brown dots</p> |

|                                                                                                                                                                                                                                                                                                                                                                                                    |                                                                                                                                                                                                         |                                                                                                                                                                                    |                                                                                                                                                                                                                                         |
|----------------------------------------------------------------------------------------------------------------------------------------------------------------------------------------------------------------------------------------------------------------------------------------------------------------------------------------------------------------------------------------------------|---------------------------------------------------------------------------------------------------------------------------------------------------------------------------------------------------------|------------------------------------------------------------------------------------------------------------------------------------------------------------------------------------|-----------------------------------------------------------------------------------------------------------------------------------------------------------------------------------------------------------------------------------------|
| 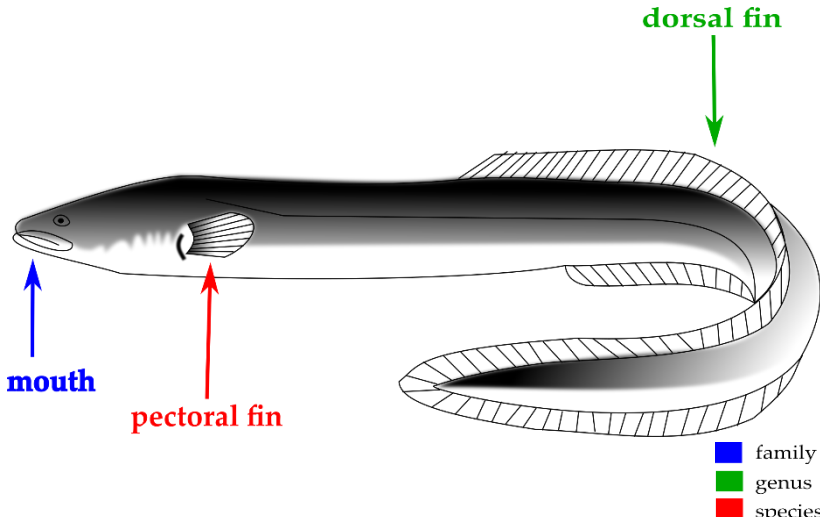 <p>Diagram of an eel (Anguillidae) showing its body shape, mouth, pectoral fin, and dorsal fin. The mouth is labeled with a blue arrow, the pectoral fin with a red arrow, and the dorsal fin with a green arrow. A legend indicates: blue square for family, green square for genus, red square for species.</p> | <p><b>Anguillidae (family):</b> Lower jaw projects beyond upper; well-developed fleshy flanges on upper and lower lips.</p>                                                                             | <p><b>Anguilla (genus):</b> Teeth small, granular, in narrow to broad bands on jaws and vomer. dorsal fin begins well behind pectoral fins, somewhat in front of or above anus</p> | <p><b>anguilla (species):</b> dorsal fin begins well behind pectoral fin, closer to anus than to pectoral-fin base; pectoral fin well developed. Small oval scales present, embedded in skin and arranged in a basket-weave pattern</p> |
| 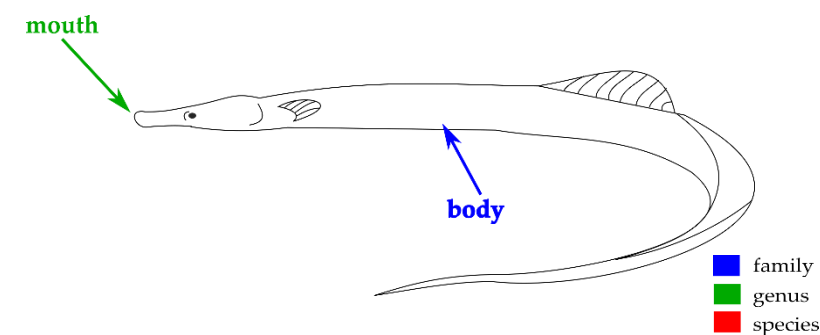 <p>Diagram of a pipefish (Syngnathidae) showing its elongate body, mouth, and body shape. The mouth is labeled with a green arrow, and the body is labeled with a blue arrow. A legend indicates: blue square for family, green square for genus, red square for species.</p>                                     | <p><b>Syngnathidae (family):</b> Body elongate to extremely so; encased in bony armour arranged into series of rings. Mouth small, toothless, placed at end of tubular snouts</p>                       |                                                                                                                                                                                    | <p><b>Syngnathus abaster (genus characteristics):</b> Mouth at end of tubular snout</p>                                                                                                                                                 |
| 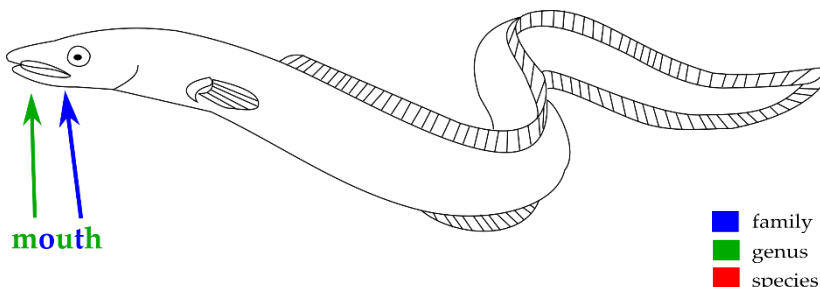 <p>Diagram of a conger (Congridae) showing its body shape, mouth, and body shape. The mouth is labeled with a green arrow, and the body is labeled with a blue arrow. A legend indicates: blue square for family, green square for genus, red square for species.</p>                                           | <p><b>Congridae (family):</b> Teeth on vomer (roof of mouth) typically in a triangular or oval, multiserial patch but may also be uniserial, branchiostegal rays long but not overlapping ventrally</p> | <p><b>Conger conger (genus characteristics):</b> Teeth biserial on jaws, the outer row forming a conspicuous cutting edge</p>                                                      |                                                                                                                                                                                                                                         |

|                                                                                                                                                          |                                                                                                                                                                                                                                                                                                                                              |                                                                                                                                                                                                                                   |
|----------------------------------------------------------------------------------------------------------------------------------------------------------|----------------------------------------------------------------------------------------------------------------------------------------------------------------------------------------------------------------------------------------------------------------------------------------------------------------------------------------------|-----------------------------------------------------------------------------------------------------------------------------------------------------------------------------------------------------------------------------------|
| 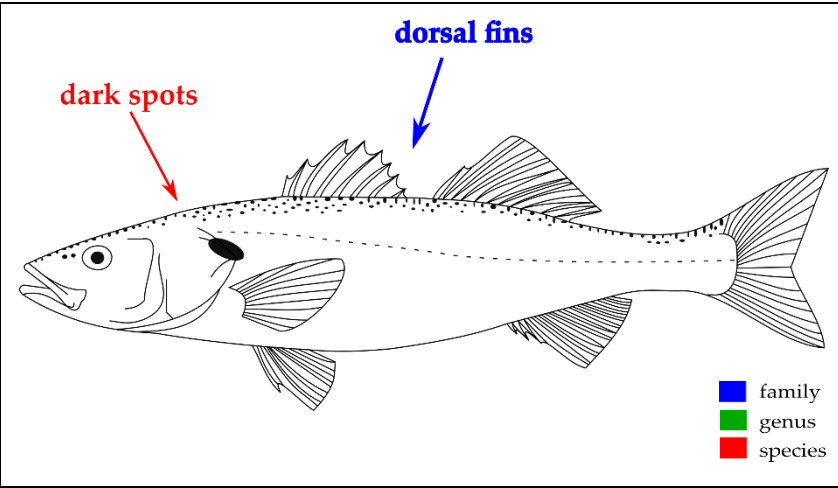 <p>dark spots</p> <p>dorsal fins</p> <p>family<br/>genus<br/>species</p> | <p><b>Moronidae (family):</b> Rear edge of opercle with 2 flat spines but no horizontal ridge; mouth terminal, slightly protrusile; rear end of maxilla exposed, not slipping under preorbital bone; no supramaxilla. Two separate dorsal fins, the first with 8 to 10 slender spines, second dorsal fin with 1 spine, 9 to 14 soft rays</p> | <p><b><i>Dicentrarchus labrax</i> (species characteristics):</b> Adults uniform silvery; juveniles silvery with several faint dark spots scattered over the body; vomer tooth patch crescentic, no median posterior extension</p> |
|----------------------------------------------------------------------------------------------------------------------------------------------------------|----------------------------------------------------------------------------------------------------------------------------------------------------------------------------------------------------------------------------------------------------------------------------------------------------------------------------------------------|-----------------------------------------------------------------------------------------------------------------------------------------------------------------------------------------------------------------------------------|

Table S3. Applications of Mediterranean fish for Sustainable Development Goals.

| SCIENTIFIC NAME              | HUMAN<br>FEEDING<br>USE | RESTOCKING<br>USE                         | AQUACULTURE<br>AND<br>VALLICULTURE | AQUARIOLOGY<br>USE  | ANIMAL<br>FEEDING<br>USE     | MEDICAL<br>USE        |
|------------------------------|-------------------------|-------------------------------------------|------------------------------------|---------------------|------------------------------|-----------------------|
| <i>Anguilla anguilla</i>     | Taktaka et al. [98]     | Rossi et al. [101]                        | Lovatelli and Holthus [111]        | n.d.                | Sila et al. [115]            | n.d.                  |
| <i>Aphanius fasciatus</i>    | -                       | Zogaris [102]                             | n.d.                               | Novak et al., [114] | n.d.                         | n.d.                  |
| <i>Apogon imberbis</i>       | n.d.                    | Molinari and Bonel [103]                  | n.d.                               | AIAM [37]           | n.d.                         | n.d.                  |
| <i>Atherina boyeri</i>       | Dal Bosco et al. [99]   | IUCN [34]                                 | Cataudella and Bronzi [104]        | n.d.                | Gumus [116]                  | n.d.                  |
| <i>Belone belone</i>         | Koral et al. [95]       | n.d.                                      | Rosenthal and Fonds [112]          | n.d.                | Wikipedia [35]               | IRCCS HUMANITAS [38]  |
| <i>Boops boops</i>           | Benessere [36]          | n.d.                                      | n.d.                               | n.d.                | Estefanell et al. [117]      | Lassoued et al. [118] |
| <i>Chelon labrosus</i>       | Zerunian [96]           | Zerunian [96]                             | Cataudella and Bronzi [104]        | n.d.                | Iandoli and Trincanato [113] | n.d.                  |
| <i>Conger conger</i>         | Wikipedia [35]          | Molinari and Bonel [103]                  | n.d.                               | n.d.                | n.d.                         | n.d.                  |
| <i>Coris julis</i>           | Wikipedia [35]          | Molinari and Bonel [103]                  | n.d.                               | AIAM [37]           | n.d.                         | n.d.                  |
| <i>Dicentrarchus labrax</i>  | Zerunian [96]           | Zerunian [96]                             | Lovatelli and Holthus [119]        | n.d.                | n.d.                         | IRCCS HUMANITAS [38]  |
| <i>Diplodus puntazzo</i>     | Benessere [36]          | n.d.                                      | Iandoli and Trincanato [113]       | n.d.                | n.d.                         | n.d.                  |
| <i>Diplodus sargus</i>       | Benessere [36]          | Santos et al. [105]; Pereira et al. [106] | Iandoli and Trincanato [113]       | n.d.                | n.d.                         | n.d.                  |
| <i>Diplodus vulgaris</i>     | Benessere [36]          | Molinari and Bonel [103]                  | n.d.                               | n.d.                | n.d.                         | n.d.                  |
| <i>Gambusia holbrooki</i>    | n.d.                    | AIAD [107]                                | n.d.                               | Novak et al. [114]  | n.d.                         | n.d.                  |
| <i>Gobius bucchichi</i>      | n.d.                    | n.d.                                      | n.d.                               | Wikipedia [35]      | Wikipedia [35]               | n.d.                  |
| <i>Gobius cobitis</i>        | Wikipedia [35]          | n.d.                                      | n.d.                               | n.d.                | n.d.                         | n.d.                  |
| <i>Gobius niger</i>          | Zerunian [96]           | n.d.                                      | n.d.                               | Wikipedia [35]      | n.d.                         | n.d.                  |
| <i>Gobius paganellus</i>     | Wikipedia [35]          | n.d.                                      | n.d.                               | Wikipedia [35]      | n.d.                         | n.d.                  |
| <i>Hippocampus ramulosus</i> | -                       | -                                         | -                                  | -                   | -                            | -                     |
| <i>Lichia amia</i>           | Benessere [36]          | n.d.                                      | n.d.                               | n.d.                | n.d.                         | IRCCS HUMANITAS [38]  |
| <i>Lithognathus mormyrus</i> | Wikipedia [35]          | n.d.                                      | n.d.                               | n.d.                | n.d.                         | n.d.                  |
| <i>Liza aurata</i>           | Benessere [36]          | n.d.                                      | Cataudella and Bronzi [104]        | n.d.                | Iandoli and Trincanato [113] | n.d.                  |
| <i>Liza ramada</i>           | Zerunian [96]           | n.d.                                      | Lovatelli and Holthus [119]        | n.d.                | Iandoli and Trincanato [113] | n.d.                  |

|                                                             |                    |                          |                             |                |                              |                      |
|-------------------------------------------------------------|--------------------|--------------------------|-----------------------------|----------------|------------------------------|----------------------|
| <i>Liza saliens</i>                                         | Wikipedia [35]     | n.d.                     | Cataudella and Bronzi [104] | n.d.           | Iandoli and Trincanato [113] | n.d.                 |
| <i>Mugil cephalus</i>                                       | Zerunian [96]      | Santos et al. [105]      | Lovatelli and Holthus [111] | n.d.           | Iandoli and Trincanato [113] | Rosa et al. [127]    |
| <i>Mullus surmuletus</i>                                    | [34, Wikipedia 35] | Molinari and Bonel [103] | n.d.                        | n.d.           | n.d.                         | IRCCS HUMANITAS [38] |
| <i>Muraena helena</i>                                       | Wikipedia [35]     | Molinari and Bonel [103] | n.d.                        | n.d.           | n.d.                         | n.d.                 |
| <i>Oblada melanura</i>                                      | Wikipedia [35]     | Molinari and Bonel [103] | n.d.                        | n.d.           | n.d.                         | IRCCS HUMANITAS [38] |
| <i>Parablennius pilicornis</i>                              | n.d.               | n.d.                     | n.d.                        | AIAM [37]      | n.d.                         | n.d.                 |
| <i>Sarpa salpa</i>                                          | Wikipedia [35]     | Molinari and Bonel [103] | n.d.                        | n.d.           | n.d.                         | n.d.                 |
| <i>Scorpaena scrofa</i>                                     | Reale et al. [100] | Özgüla et al. [116]      | n.d.                        | n.d.           | n.d.                         | Reale et al. [100]   |
| <i>Serranus hepatus</i>                                     | Wikipedia [35]     | n.d.                     | n.d.                        | Wikipedia [35] | n.d.                         | n.d.                 |
| <i>Symphodus tinca</i>                                      | Wikipedia [35]     | Molinari and Bonel [103] | n.d.                        | Wikipedia [35] | n.d.                         | n.d.                 |
| <i>Solea senegalensis</i>                                   | Morais et al. [97] | Abate et al. [109]       | Morais et al. [97]          | n.d.           | n.d.                         | n.d.                 |
| <i>Sparus aurata</i>                                        | Wikipedia [35]     | Santos et al. [105]      | Lovatelli and Holthus [111] | n.d.           | n.d.                         | IRCCS HUMANITAS [38] |
| <i>Syngnathus abaster</i>                                   | n.d.               | Rodríguez et al. [110]   | n.d.                        | n.d.           | n.d.                         | n.d.                 |
| <i>Thalassoma pavo</i>                                      | n.d.               | n.d.                     | n.d.                        | Wikipedia [35] | n.d.                         | n.d.                 |
| <b>Abbreviations:</b> n.d. not detected; - not recommended. |                    |                          |                             |                |                              |                      |

Table S4: Fish Conservation Status of Mellah Lagoon and Population Density through the years (2006; 2017; 2018, 2021).

| Scientific name                | Family<br>Order                       | Conservation<br>status<br>(IUCN) | Population density    |                        |                           |
|--------------------------------|---------------------------------------|----------------------------------|-----------------------|------------------------|---------------------------|
|                                |                                       |                                  | Chaoui et al.<br>2006 | Embarek et al.<br>2017 | Our studies<br>2018, 2021 |
| <i>Anguilla anguilla</i>       | Anguillidae<br>Anguilliformes         | CR                               | HPD                   | HPD                    | HPD                       |
| <i>Apogon imberbis</i>         | Apogonidae<br>Perciformes             | LC                               | LPD                   | n.d.                   | LPD                       |
| <i>Atherina boyeri</i>         | Atherinidae<br>Atheriniformes         | LC                               | HPD                   | <b>HPD</b>             | LPD                       |
| <i>Belone belone</i>           | Belonidae<br>Beloniformes             | LC                               | LPD                   | n.d.                   | LPD                       |
| <i>Lichia amia</i>             | Belonidae<br>Perciformes              | LC                               | LPD                   | n.d.                   | LPD                       |
| <i>Parablennius pilicornis</i> | Blenniidae<br>Perciformes             | LC                               | HPD                   | n.d.                   | HPD                       |
| <i>Conger conger</i>           | Congridae<br>Anguilliformes           | LC                               | LPD                   | n.d.                   | HPD                       |
| <i>Aphanius fasciatus</i>      | Cyprinodontidae<br>Cyprinodontiformes | LC                               | HPD                   | HPD                    | LPD                       |
| <i>Gobius cobitis</i>          | Gobiidae<br>Perciformes               | LC                               | HPD                   | n.d.                   | HPD                       |
| <i>Gobius bucchichi</i>        | Gobiidae<br>Perciformes               | LC                               | HPD                   | n.d.                   | HPD                       |
| <i>Gobius niger</i>            | Gobiidae<br>Perciformes               | LC                               | HPD                   | n.d.                   | HPD                       |
| <i>Gobius paganellus</i>       | Gobiidae<br>Perciformes               | LC                               | HPD                   | n.d.                   | HPD                       |
| <i>Coris julis</i>             | Labridae<br>Perciformes               | LC                               | LPD                   | n.d.                   | LPD                       |
| <i>Simphodus tinca</i>         | Labridae<br>Perciformes               | LC                               | LPD                   | n.d.                   | LPD                       |
| <i>Thalassoma pavo</i>         | Labridae<br>Perciformes               | LC                               | LPD                   | n.d.                   | LPD                       |
| <i>Dicentrarchus labrax</i>    | Moronidae<br>Perciformes              | LC                               | HPD                   | n.d.                   | HPD                       |
| <i>Chelon labrosus</i>         | Mugilidae<br>Mugiliformes             | LC                               | HPD                   | n.d.                   | HPD                       |
| <i>Chelon aurata</i>           | Mugilidae<br>Perciformes              | LC                               | HPD                   | HPD                    | HPD                       |
| <i>Chelon ramada</i>           | Mugilidae<br>Perciformes              | LC                               | LPD                   | n.d.                   | HPD                       |
| <i>Liza saliens</i>            | Mugilidae<br>Perciformes              | LC                               | LPD                   | HPD                    | LPD                       |
| <i>Mugil cephalus</i>          | Mugilidae<br>Perciformes              | LC                               | HPD                   | HPD                    | HPD                       |
| <i>Mullus surmuletus</i>       | Mullidae<br>Perciformes               | LC                               | LPD                   | n.d.                   | LPD                       |
| <i>Muraena helena</i>          | Muraenidae<br>Perciformes             | LC                               | HPD                   | n.d.                   | HPD                       |
| <i>Gambusia holbrooki</i>      | Poeciliidae<br>Cyprinodontiformes     | NA                               | HPD                   | n.d.                   | LPD                       |
| <i>Scorpaena scrofa</i>        | Scorpaenidae<br>Scorpaeniformes       | LC                               | LPD                   | n.d.                   | LPD                       |
| <i>Serranus hepatus</i>        | Serranidae<br>Perciformes             | LC                               | LPD                   | n.d.                   | LPD                       |

|                                                                                                                                                                                                                                                         |                                 |      |     |      |     |
|---------------------------------------------------------------------------------------------------------------------------------------------------------------------------------------------------------------------------------------------------------|---------------------------------|------|-----|------|-----|
| <i>Solea senegalensis</i>                                                                                                                                                                                                                               | Soleidae<br>Pleuronectiformes   | n.d. | HPD | n.d. | HPD |
| <i>Boops boops</i>                                                                                                                                                                                                                                      | Sparidae<br>Perciformes         | LC   | HPD | n.d. | HPD |
| <i>Diplodus puntazzo</i>                                                                                                                                                                                                                                | Sparidae<br>Perciformes         | LC   | LPD | n.d. | HPD |
| <i>Diplodus sargus</i>                                                                                                                                                                                                                                  | Sparidae<br>Perciformes         | LC   | HPD | HPD  | HPD |
| <i>Diplodus vulgaris</i>                                                                                                                                                                                                                                | Sparidae<br>Perciformes         | LC   | HPD | n.d. | HPD |
| <i>Lithognathus mormyrus</i>                                                                                                                                                                                                                            | Sparidae<br>Perciformes         | LC   | HPD | n.d. | LPD |
| <i>Sarpa salpa</i>                                                                                                                                                                                                                                      | Sparidae<br>Perciformes         | LC   | HPD | n.d. | HPD |
| <i>Sparus aurata</i>                                                                                                                                                                                                                                    | Sparidae<br>Perciformes         | LC   | HPD | HPD  | LPD |
| <i>Oblada melanura</i>                                                                                                                                                                                                                                  | Sparidae<br>Perciformes         | LC   | LPD | n.d. | LPD |
| <i>Hippocampus ramulosus</i>                                                                                                                                                                                                                            | Syngnathidae<br>Syngnathiformes | NT   | LPD | n.d. | LPD |
| <i>Syngnathus abaster</i>                                                                                                                                                                                                                               | Syngnathidae<br>Syngnathiformes | DD   | LPD | HPD  | HPD |
| <b>Abbreviations:</b> CR, critically endangered; DD, data deficient; LC, least concern; NA, not applicable; NT, near threatened; HPD, High Population Density; LPD, Low Population Density; <b>HPD</b> , the most abundant species; n.d., not detected. |                                 |      |     |      |     |
